# Supplementary material for: Fast and Sensitive Bioanalytical Method for the Determination of Deucravacitinib in Human Plasma Using HPLC-MS/MS: Application and Greenness Evaluation
Source: MDPI journal article supplement (doi:10.3390/molecules28145471), 2023-07-17
Supplement: s1 [file s1]

## Supplementary Materials

# Fast and Sensitive Bioanalytical Method for the Determination of Deucravacitinib in Human Plasma using HPLC-MS/MS; Application and Greenness Evaluation

Pottabattula Mahesh <sup>1</sup>, M. Akiful Haque <sup>1</sup>, Baher I. Salman <sup>2</sup>, Tarek S. Belal <sup>3</sup>, Adel Ehab Ibrahim <sup>4,5</sup>, Sami El Deeb <sup>6,7,\*</sup>

1 Department of Pharmaceutical Analysis, Anurag University, Venkatapur, Ghatkesar Rd., Hyderabad 500088, Telangana, India; mahi\_pharmadbm@yahoo.co.in (P.M.); akifulhaquepharmacy@anurag.edu.in (M.A.H.)

2 Pharmaceutical Analytical Chemistry Department, Faculty of Pharmacy, Al-Azhar University, Assiut Branch, Assiut 71524, Egypt; bahersalman@azhar.edu.eg

3 Pharmaceutical Analytical Chemistry Department, Faculty of Pharmacy, University of Alexandria, Alexandria 21521, Egypt; tbelaleg@yahoo.com

4 Pharmaceutical Analytical Chemistry Department, Faculty of Pharmacy, Port-Said University, Port-Said 42511, Egypt; adel@unizwa.edu.om

5 Natural and Medical Sciences Research Center, University of Nizwa, Birkat Al Mauz, Nizwa 616, Oman

6 Institute of Medicinal and Pharmaceutical Chemistry, Technische Universitaet Braunschweig, Beethovenstr. 55, 38106 Braunschweig, Germany

7 Institute of Pharmacy, Freie Universität Berlin, Queen-Luise-Strasse 2 and 4, 14195 Berlin, Germany

\* Correspondence: s.eldeeb@tu-braunschweig.de

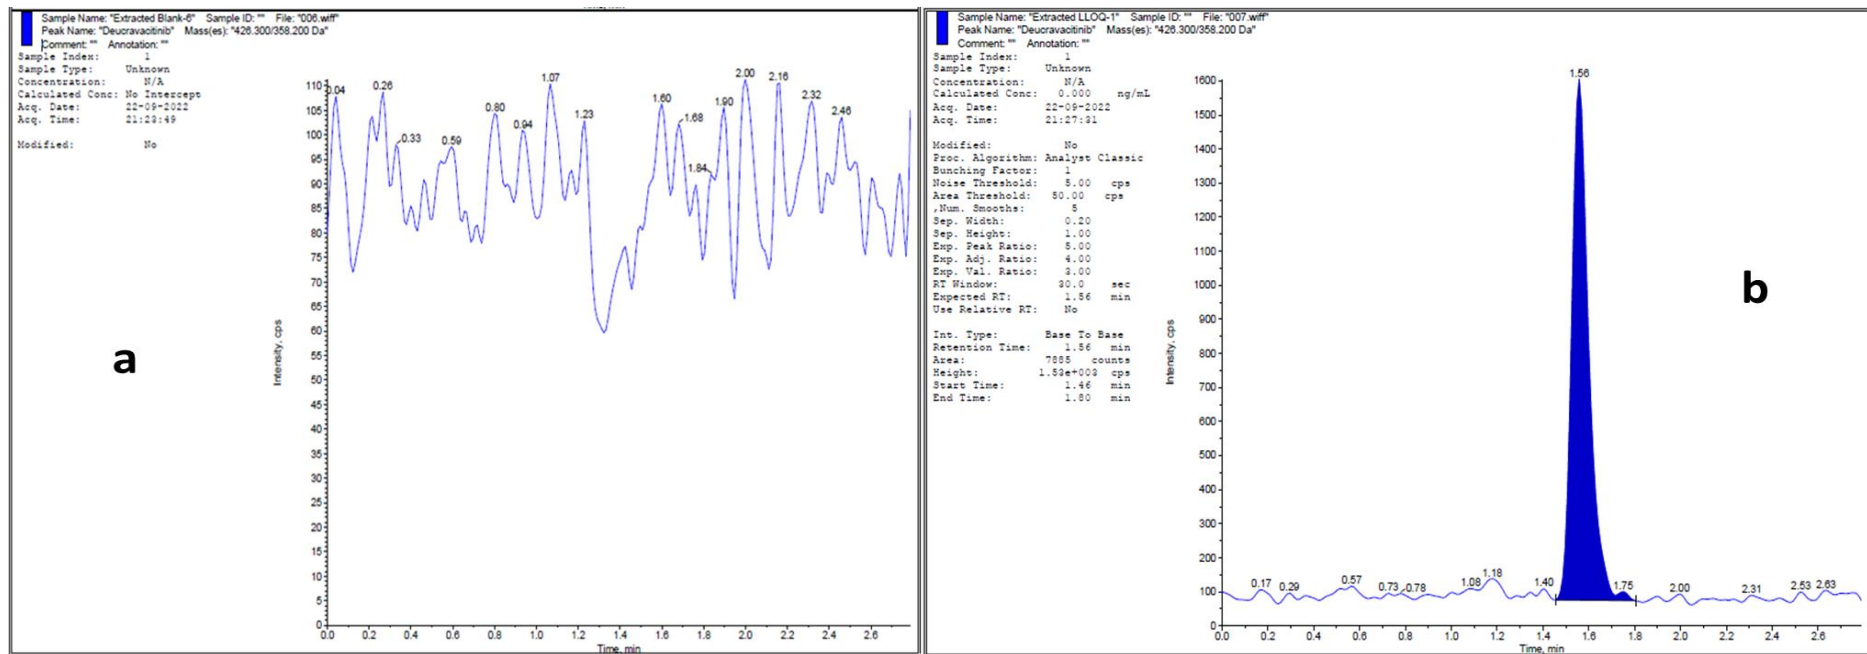

**Figure S1:** (a) Deucravacitinib, extracted blank plasma chromatogram, and (b) Deucravacitinib, extracted LLOQ chromatogram.

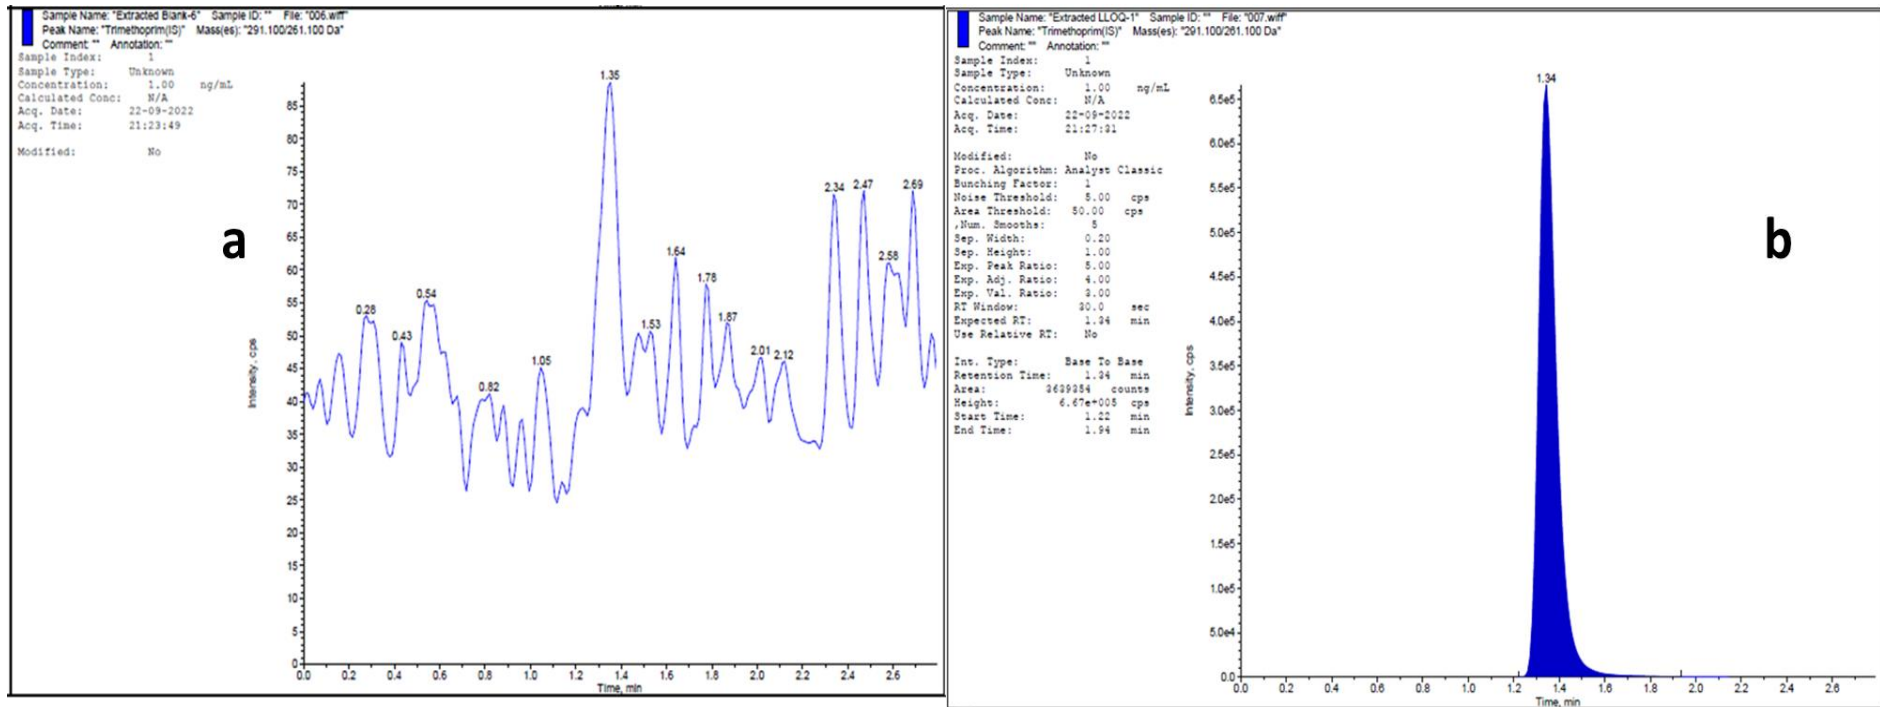

**Figure S2:** (a) Trimethoprim (IS), extracted blank plasma chromatogram, (b) Trimethoprim (IS), extracted LLOQ chromatogram.

**Table S1:** Calculation of % interference in blank

| Sample Name | Area observed at<br>RT of Analyte | Area observed at<br>RT of IS | % Interference at<br>analyte RT | % Interference at<br>IS RT |
|-------------|-----------------------------------|------------------------------|---------------------------------|----------------------------|
| Blank       | 183                               | 385                          | 2.32                            | 0.01                       |
| LLOQ        | 7885                              | 3639354                      |                                 |                            |
| Blank       | 259                               | 376                          | 3.26                            | 0.01                       |
| LLOQ        | 7938                              | 3716553                      |                                 |                            |
| Blank       | 286                               | 0                            | 3.61                            | 0.00                       |
| LLOQ        | 7919                              | 3755307                      |                                 |                            |
| Blank       | 0                                 | 118                          | 0.00                            | 0.00                       |
| LLOQ        | 9965                              | 3810218                      |                                 |                            |
| Blank       | 249                               | 293                          | 3.16                            | 0.01                       |
| LLOQ        | 7888                              | 3813922                      |                                 |                            |
| Blank       | 0                                 | 0                            | 0.00                            | 0.00                       |
| LLOQ        | 7814                              | 3978417                      |                                 |                            |
